# Supplementary material for: Development of a microfluidic “click chip” incorporating an immobilized Cu(i) catalyst
Source: Royal Society of Chemistry journal article supplement (doi:10.1039/c4ra15507f), 2014-12-15
Supplement: c4ra15507f1.pdf [file c4ra15507f1.pdf]

## Supporting Information

### Development of a microfluidic “click chip” incorporating an immobilized Cu(I) catalyst

Hairong Li,<sup>a†</sup> Joseph Whittenberg,<sup>b†</sup> Haiying Zhou,<sup>a</sup> David Ranganathan,<sup>a</sup> Amit V. Desai,<sup>b</sup> Jan Koziol,<sup>b</sup> Dexing Zeng,<sup>a</sup> Paul J. A. Kenis<sup>b</sup> and David E. Reichert<sup>a\*</sup>

<sup>a</sup> Radiological Sciences Division, Mallinckrodt Institute of Radiology, Washington University School of Medicine, 510 South Kingshighway Blvd., St. Louis, MO 63110, USA.

<sup>b</sup> Department of Chemical & Biomolecular Engineering, University of Illinois at Urbana-Champaign, 600 S. Mathews Ave., Urbana, IL 61801.

<sup>†</sup>these authors contributed equally

\*Corresponding author:

Washington University School of Medicine,  
510 S. Kingshighway Blvd., Campus Box 8225,  
St Louis, MO 63110

Phone: 314-362-8461, Fax: 314-362-9940

e-mail: [ReichertD@wustl.edu](mailto:ReichertD@wustl.edu)

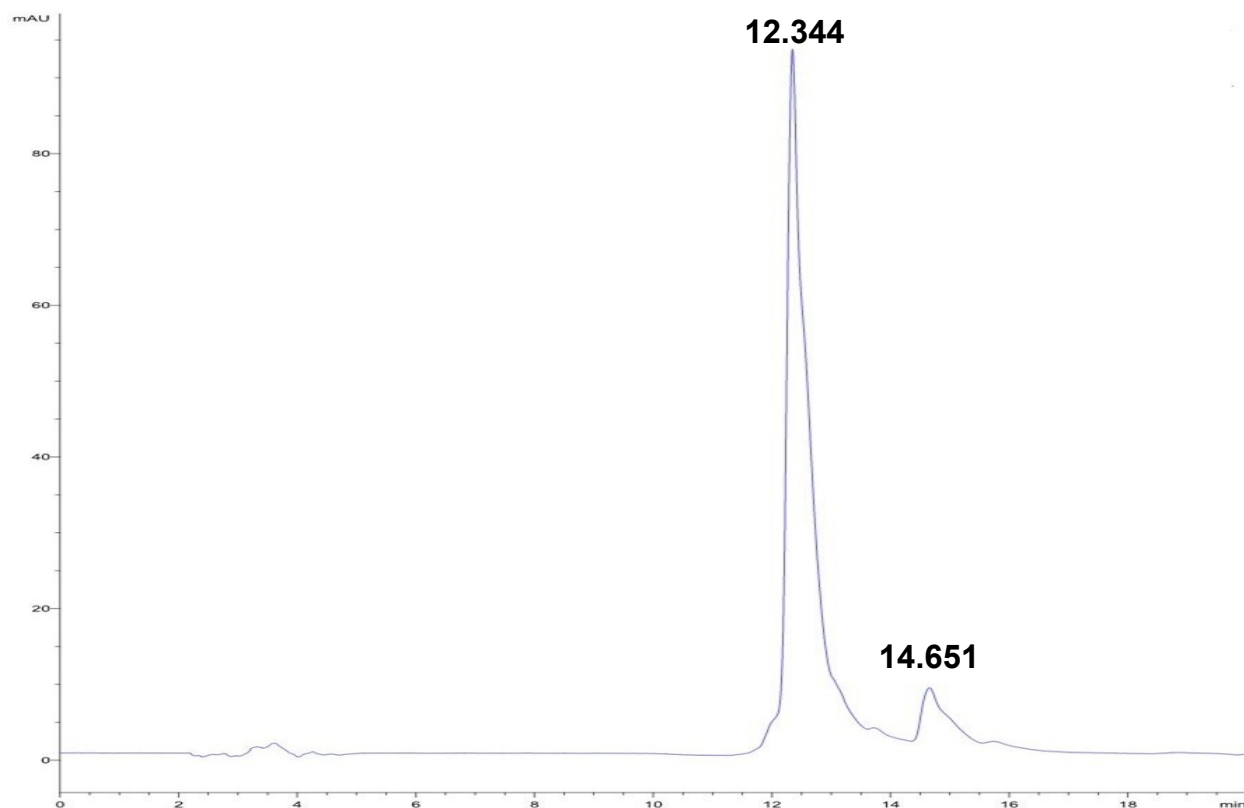

**Figure S1.** HPLC analysis of “click” reaction between Flu568-azide and propargylamine for 30 min on a functionalized microchip.

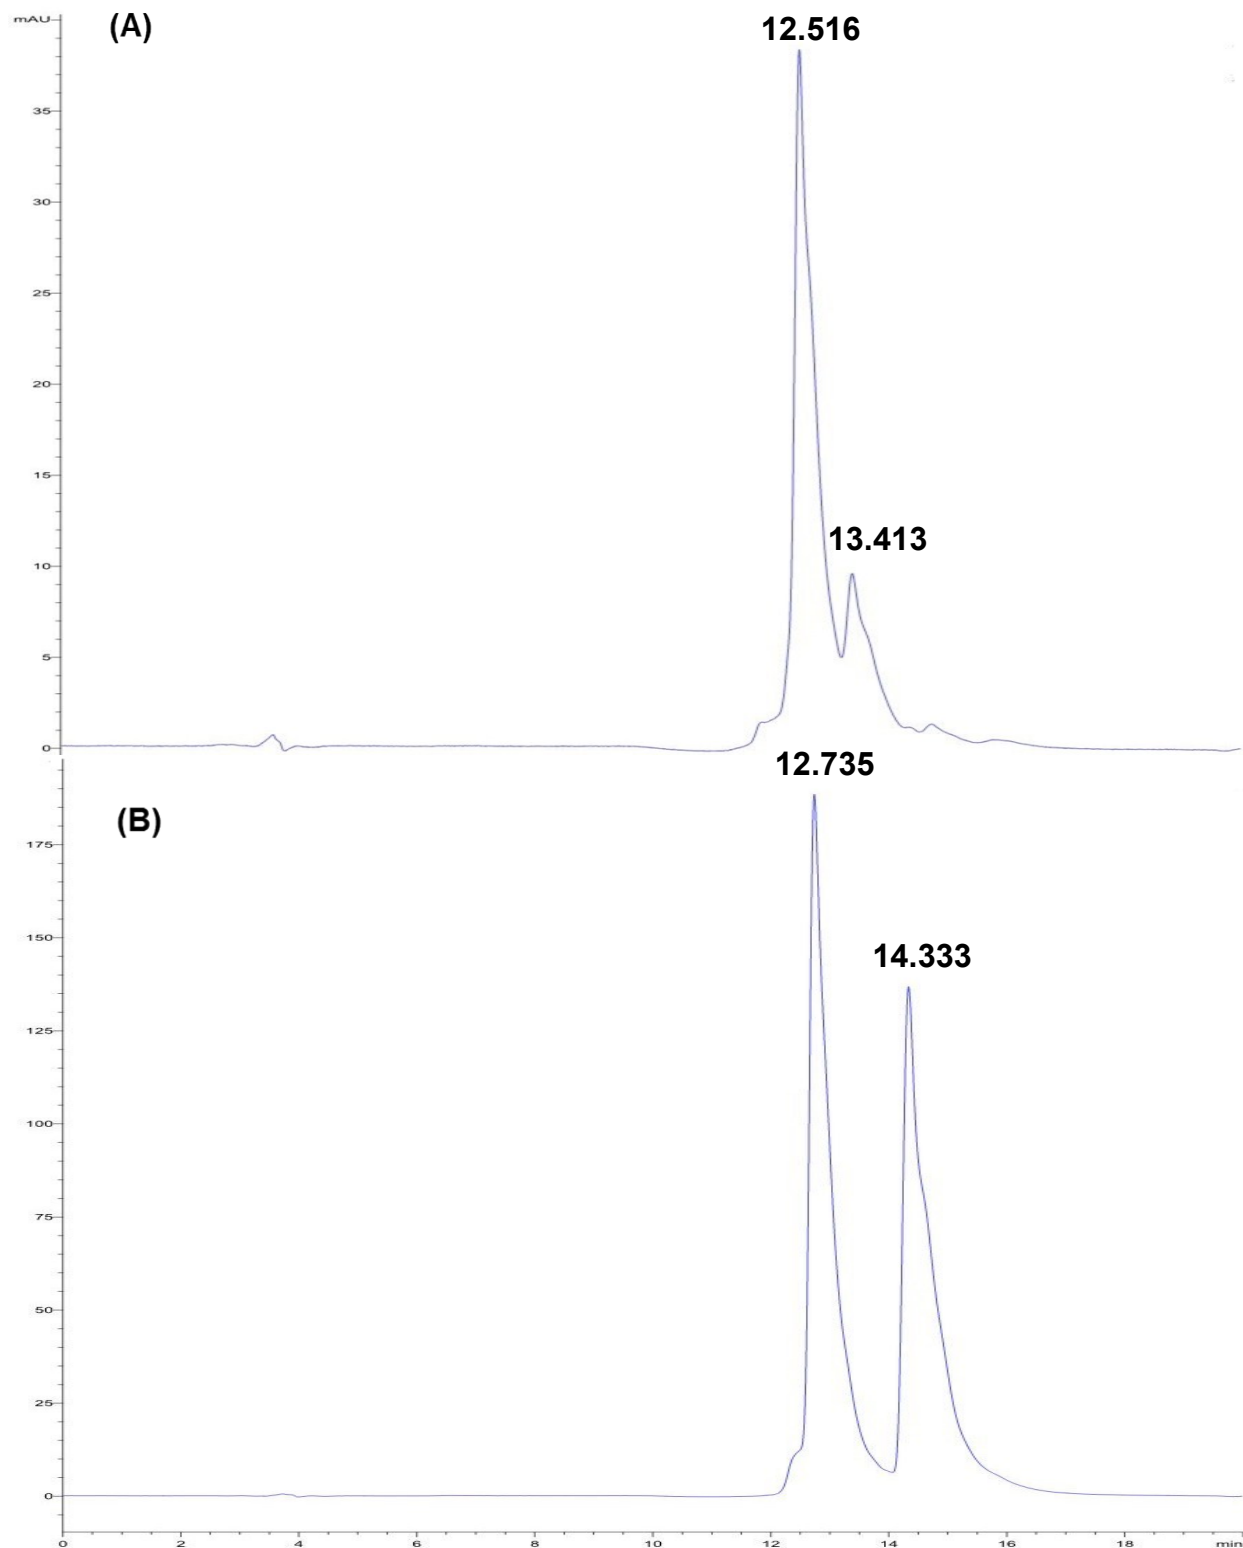

**Figure S2.** HPLC analysis of “click” reaction between Flu568-acetylene and cyclo(RGDfK)-N<sub>3</sub> for 30 min: (A) on a functionalized microchip; (B) conventionally (cat. 60%).

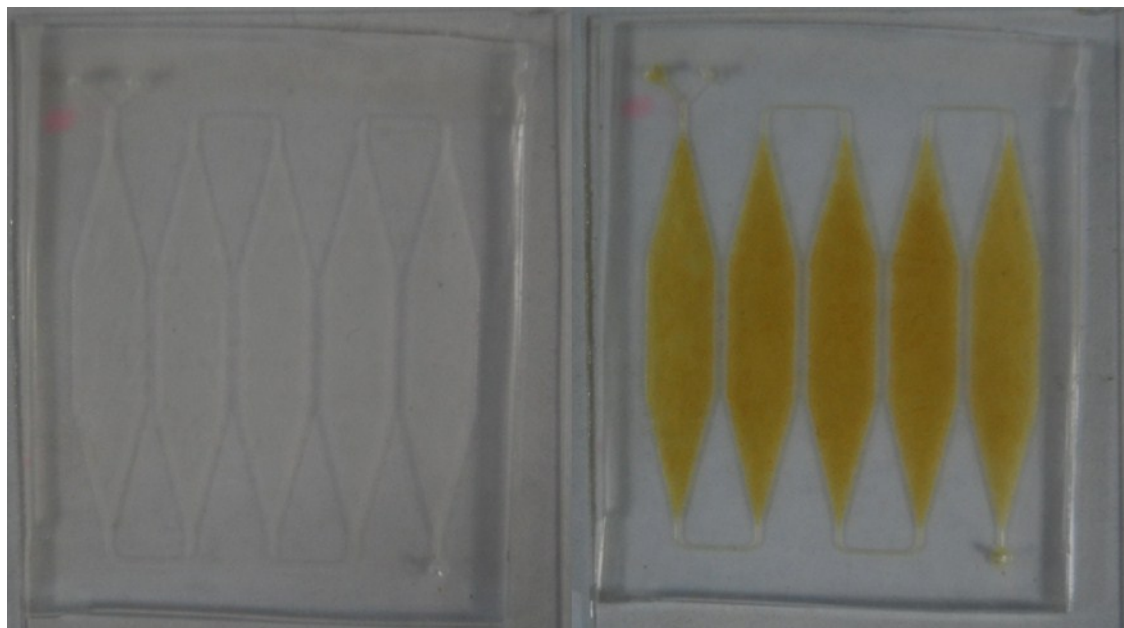

**Figure S3.** Picture of a functionalized PDMS microchip: (left) microchip functionalized with water-soluble TBTA ligand **2**; (right) a microchip functionalized with Cu(I)-ligand **2** complex.

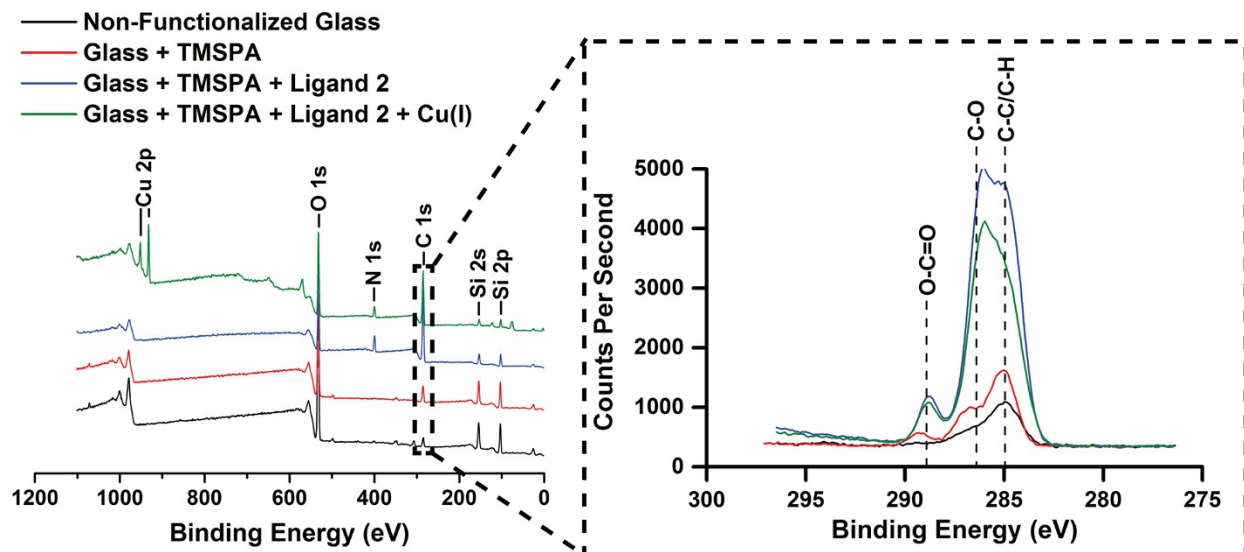

**Figure S4.** XPS survey spectra and carbon narrow scan spectra (inset) of glass sample at each stage of functionalization: (black) non-functionalized glass; (red) glass+TMSPA; (blue) glass+TMSPA+ligand 2; (green) glass+TMSPA+ligand 2+Cu(I).

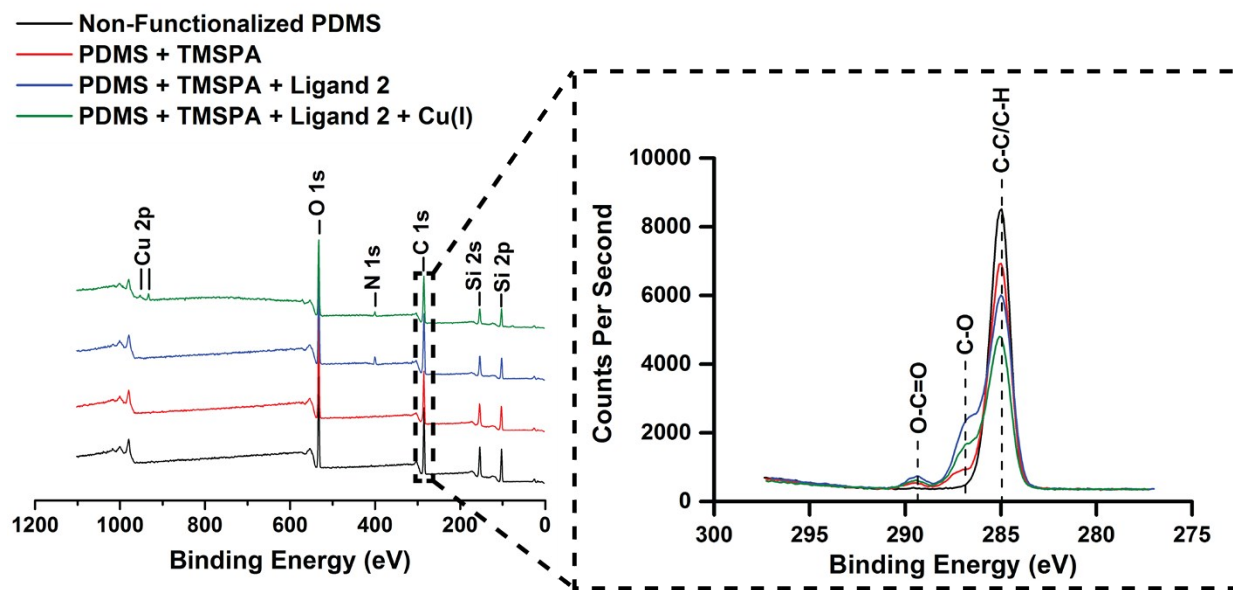

**Figure S5.** XPS survey spectra and carbon narrow scan spectra (inset) of PDMS sample at each stage of functionalization: (black) non-functionalized PDMS; (red) PDMS+TMSPA; (blue) PDMS+TMSPA+ligand 2; (green) PDMS+TMSPA+ligand 2+Cu(I).

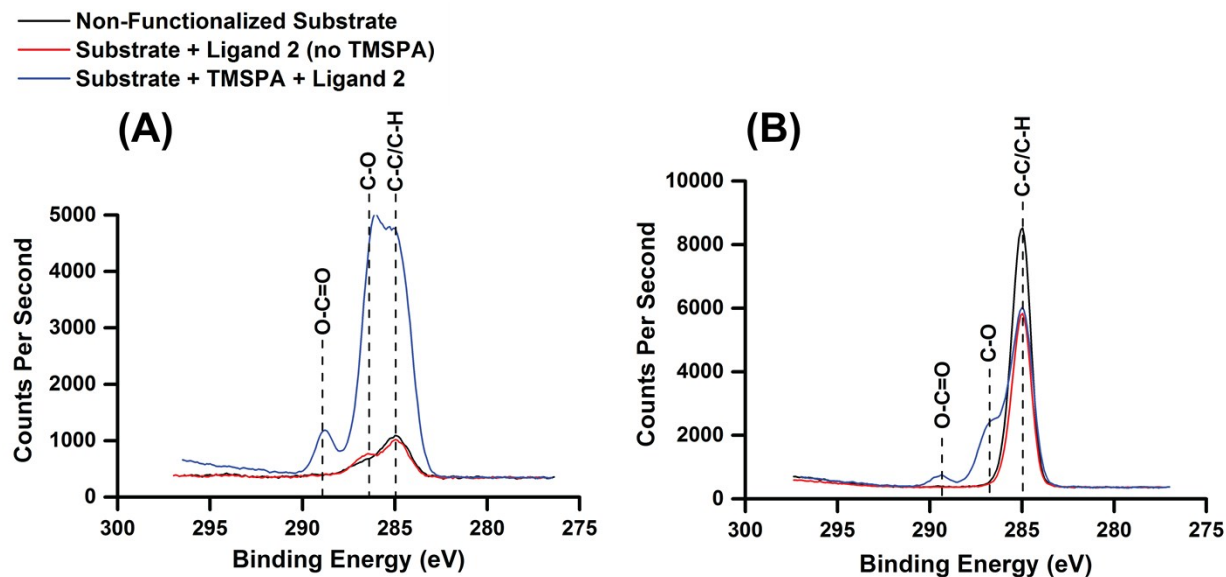

**Figure S6.** XPS carbon narrow scan spectra of (A) glass and (B) PDMS for (black) non-functionalized samples; (red) samples functionalized with ligand **2** without prior functionalization with TMSPA; (blue) samples functionalized with ligand **2** with prior functionalization with TMSPA.

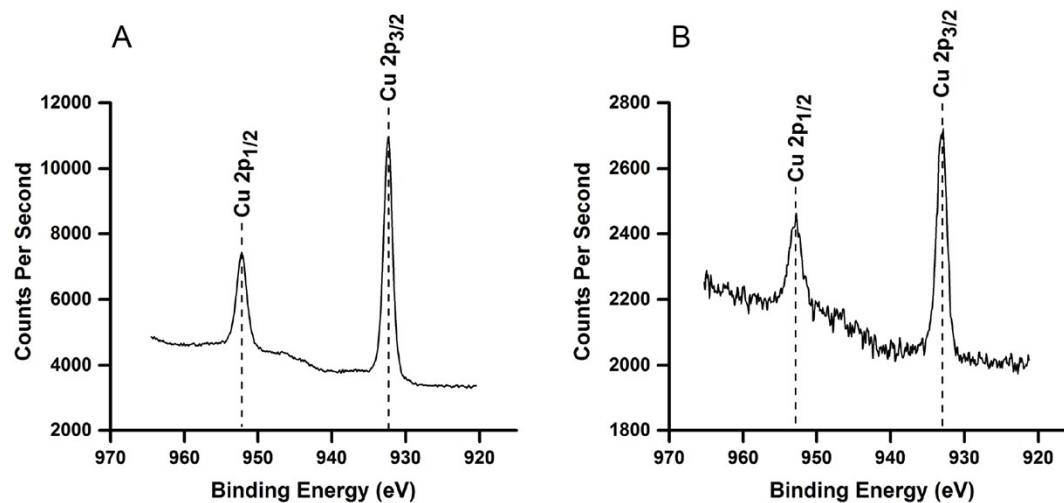

**Figure S7.** Copper narrow scan spectra for (A) glass and (B) PDMS substrate functionalized with TMSPA, ligand **2**, and Cu(I).

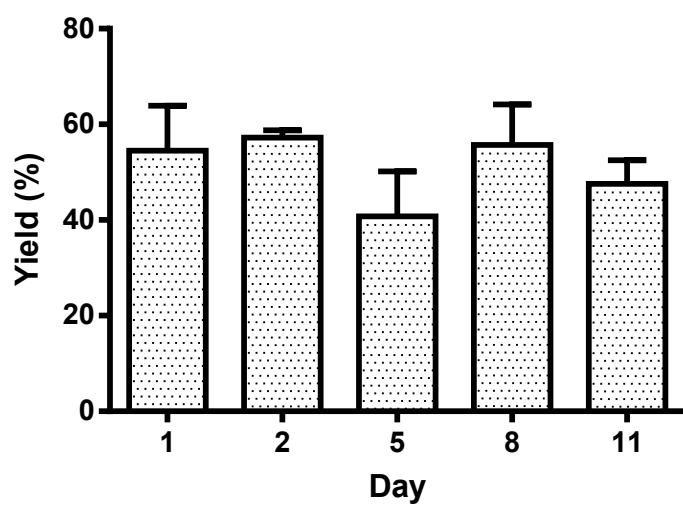

**Figure S8.** “Click” reaction between Flu568-azide and propargylamine on a functionalized microchip for 15 min at 37 °C on different days (n=3-4).

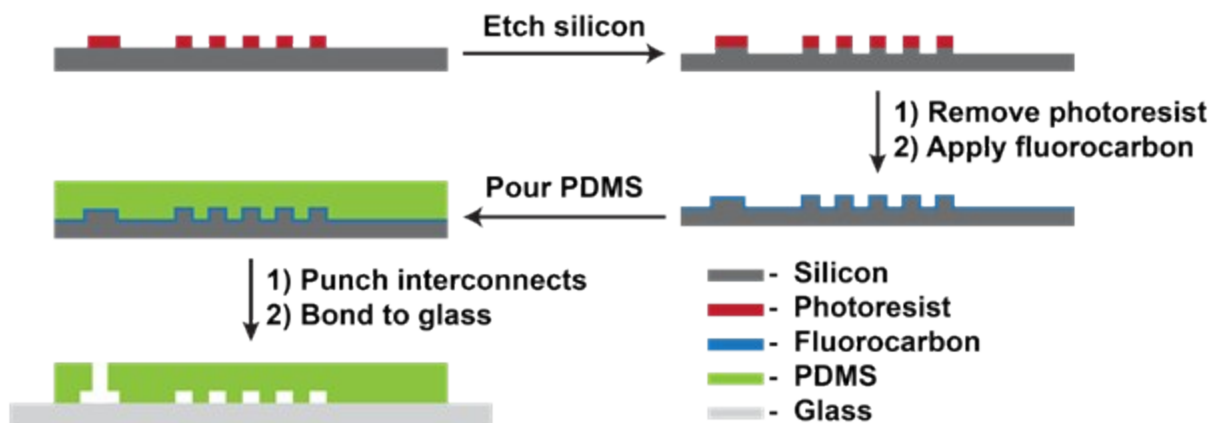

**Figure S9.** Fabrication steps for making PDMS-glass microreactors: PDMS master was made by etching a silicon wafer with patterned photoresist by DRIE technique; the photoresist was removed and a PTFE-like layer (fluorocarbon) was applied to the etched silicon surface to prevent PDMS from adhering to the wafer; PDMS was poured onto the master and polymerized in an oven; interconnects were punched for inserting inlet and outlet tubing, and finally the PDMS imprint was bonded to glass.
